# Supplementary material for: Tracking Extracellular Matrix Remodeling in Lungs Induced by Breast Cancer Metastasis. Fourier Transform Infrared Spectroscopic Studies
Source: PubMed Central journal article supplement (PMC6982691; doi:10.3390/molecules25010236), 2020-01-06
Supplement: molecules-25-00236-s001.pdf [file molecules-25-00236-s001.pdf]

## Supplementary Materials

*Research Article*

# Tracking extracellular matrix remodeling in lungs induced by breast cancer metastasis. Fourier Transform Infrared spectroscopic studies

Karolina Chrabaszc<sup>1§</sup>, Katarzyna Kaminska<sup>2§</sup>, Karolina Augustyniak<sup>1</sup>, Monika Kujdowicz<sup>1,3</sup>, Marta Smeda<sup>2</sup>, Agnieszka Jaszta<sup>2</sup>, Marta Stojak<sup>2</sup>, Katarzyna M. Marzec<sup>2</sup>, Kamilla Malek<sup>1\*</sup>

<sup>1</sup> Faculty of Chemistry, Jagiellonian University, Gronostajowa 2, 30-387 Krakow, Poland

<sup>2</sup> Jagiellonian Centre for Experimental Therapeutics, Jagiellonian University, Bobrzynskiego 14, 30-384 Krakow, Poland

<sup>3</sup> Department of Pathology, Medical Faculty, Jagiellonian University Medical College, Grzegorzeczka 16, 31-531, Krakow, Poland

**Table S1.** Summary of collected data from N=3 mice/group.

| Group   | No. of lung cross-sections | FTIR-imaged area [mm <sup>2</sup> ] | No. of recorded FTIR spectra |
|---------|----------------------------|-------------------------------------|------------------------------|
| control | 14                         | 315.6                               | 10 846 377                   |
| week 1  | 14                         | 338.3                               | 11 118 139                   |
| week 2  | 14                         | 311.1                               | 10 248 459                   |
| week 3  | 14                         | 329.0                               | 11 002 633                   |
| week 4  | 13                         | 355.7                               | 11 784 069                   |
| week 5  | 9                          | 298.9                               | 10 158 080                   |

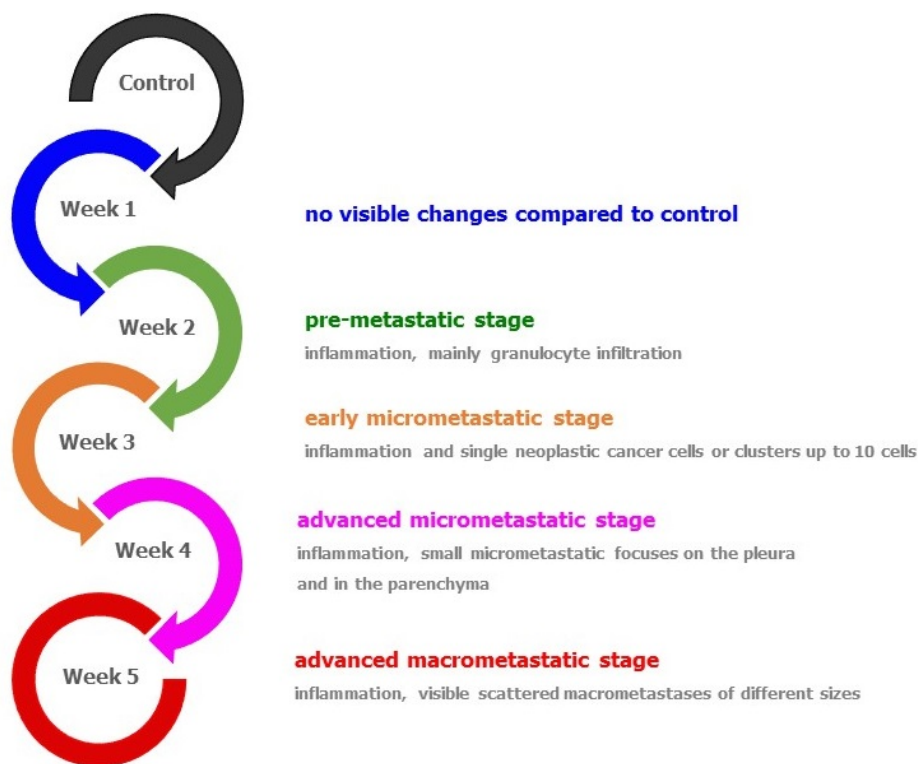

**Figure S1.** A schematic of the investigated phases of pulmonary breast cancer metastasis. Development of lung inflammation and metastases were examined from week 1 to week 5 following 4T1 cancer cells transplantation

A. Healthy control

B. Advanced macrometastasis (week 5)

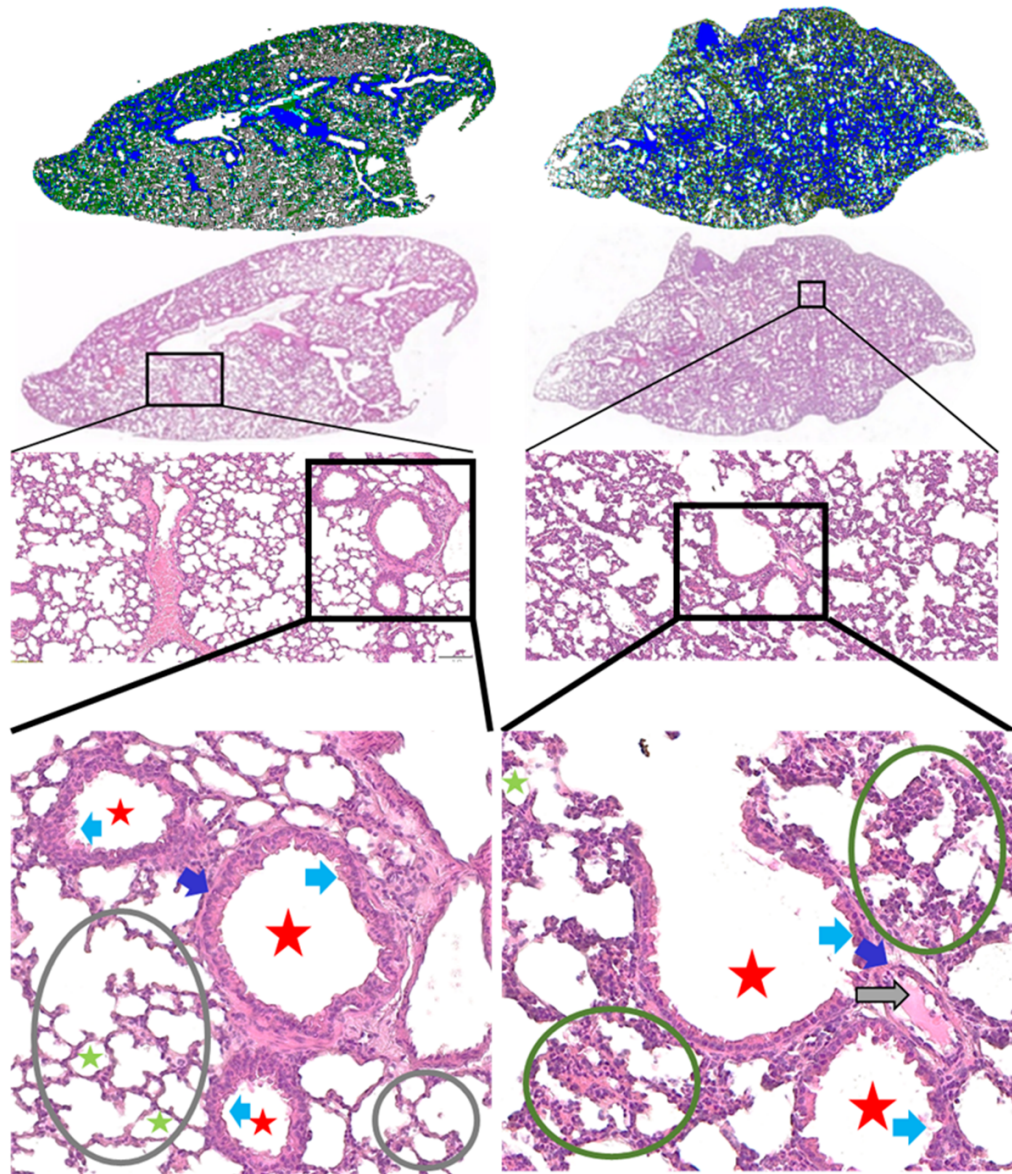

| <b>Legend</b>                                                                       |                                                       |                                                                                     |                              |  | fibrous tissue                                          |
|-------------------------------------------------------------------------------------|-------------------------------------------------------|-------------------------------------------------------------------------------------|------------------------------|-------------------------------------------------------------------------------------|---------------------------------------------------------|
|  | bronchiole lumen lined with respiratory epithelium    |  | goblet cells/ ciliate cells  |  | normal lung parenchyma                                  |
|  | lung pulmonary alveoli lined with alveolar epithelium |  | small pulmonary artery lumen |  | lung parenchyma with extensive inflammation/atelectasis |

**Figure S2.** H&E microphotographs (20x) showing cellular phenotypes of lung parenchyma observed in healthy control (A) and advanced macrometastasis (B).

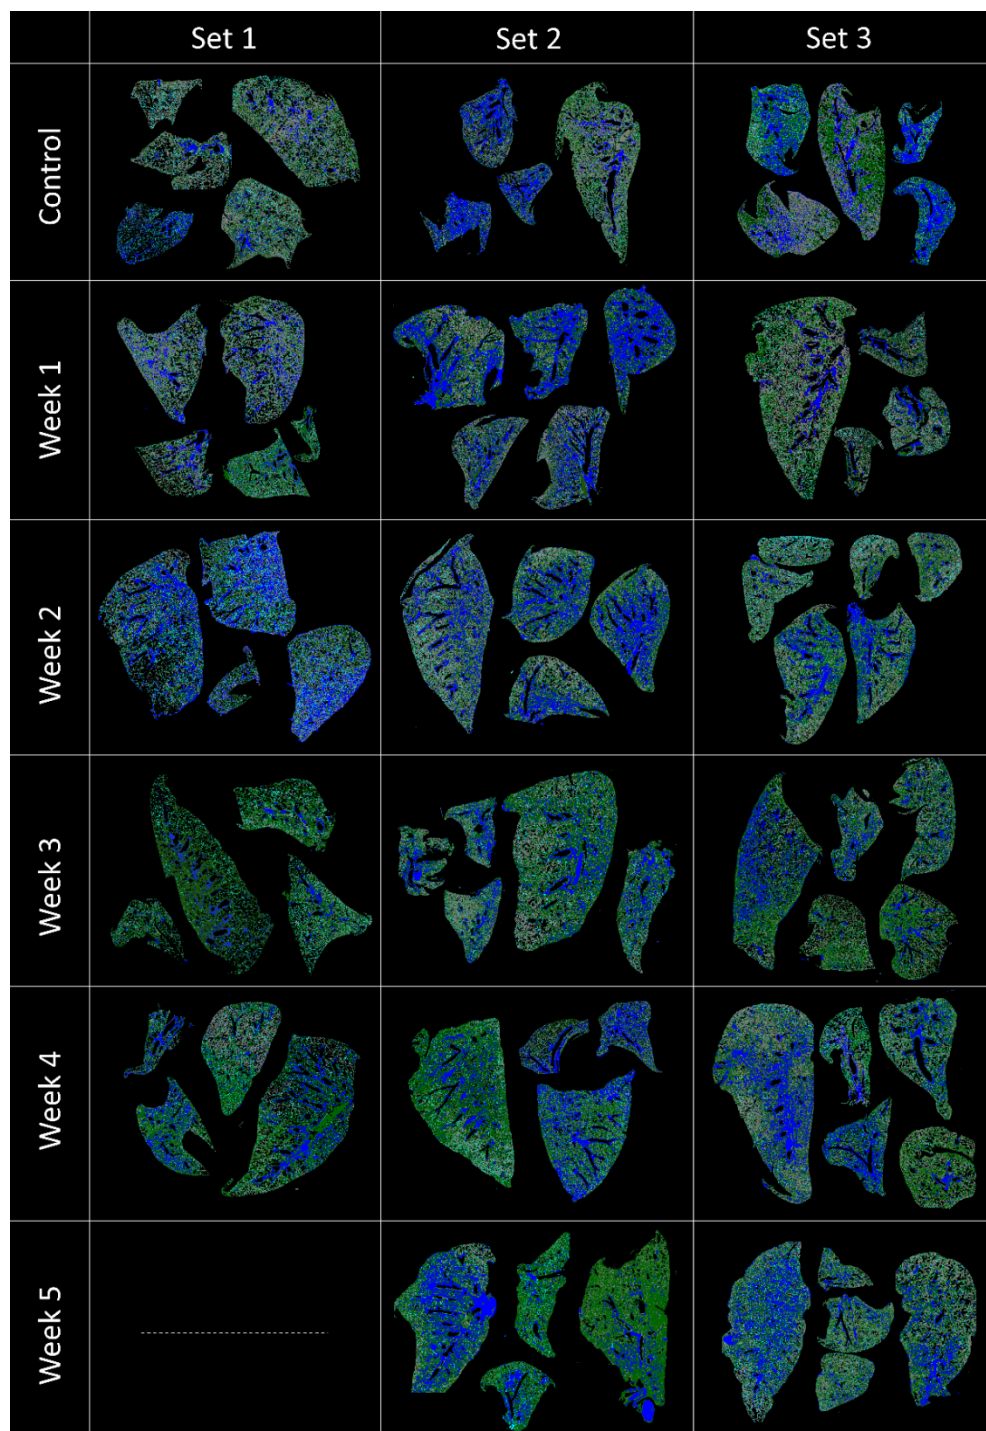

**Figure S3.** UHCA clustering of the measured IR images of the lung cross-sections into parenchyma (*grey*), atelectasis (*green*), fibrous/muscular (*blue*), and bronchi ciliate cells (*aqua*) for pulmonary metastasis of breast cancer compared to healthy control; week 1 and 2 – the pre-metastatic phase, week 3 – the early micrometastatic stage, week 4 – the advanced micrometastatic phase, and week 5 – the advanced macrometastatic stage. For more information about FTIR imaged area of tissues and collected spectra see Table 1.
